# Supplementary material
Source: PubMed Central journal article supplement (PMC3106966)
Supplement: supp_dyq205_supplement.pdf [file supp_dyq205_supplement.pdf]

## **Online Supplement**

### **Conventional and Mendelian randomization analyses suggest no association between lipoprotein (a) and early atherosclerosis: the Young Finns Study**

Mika Kivimäki, Costan G. Magnussen, Markus Juonala, Mika Kähönen, Johannes Kettunen, Terho Lehtimäki, Jorma Viikari, Olli T. Raitakari

**eTable1. Genowide association analysis of SNPs associated with Lp(a) in 2007.**

| SNP        | Chr | N    | Alleles/MAF | Effect size* | SE    | P             |
|------------|-----|------|-------------|--------------|-------|---------------|
| rs783147   | 6   | 2022 | A/G/0.47    | -0.495       | 0.029 | 3.08 x 10E-58 |
| rs2457564  | 6   | 2017 | G/A/0.47    | 0.492        | 0.030 | 3.00 x 10E-57 |
| rs2076828  | 6   | 2022 | G/C/0.47    | 0.489        | 0.030 | 1.08 x 10E-56 |
| rs2504926  | 6   | 2022 | A/G/0.47    | 0.489        | 0.030 | 1.62 x 10E-56 |
| rs1782627  | 6   | 2021 | G/A/0.45    | -0.427       | 0.031 | 9.06 x 10E-42 |
| rs2048327  | 6   | 2023 | G/A/0.29    | 0.382        | 0.034 | 1.10 x 10E-28 |
| rs2292334  | 6   | 2022 | A/G/0.29    | 0.382        | 0.034 | 1.10 x 10E-28 |
| rs1652500  | 6   | 2019 | G/A/0.23    | 0.401        | 0.036 | 9.37 x 10E-28 |
| rs11970528 | 6   | 2023 | A/G/0.46    | -0.335       | 0.031 | 6.45 x 10E-27 |
| rs2186129  | 6   | 2021 | C/A/0.47    | -0.336       | 0.031 | 8.91 x 10E-27 |
| rs2665355  | 6   | 2013 | C/G/0.43    | 0.339        | 0.032 | 3.13 x 10E-26 |
| rs2457571  | 6   | 2021 | A/G/0.43    | 0.337        | 0.032 | 4.60 x 10E-26 |
| rs7758229  | 6   | 2020 | A/C/0.27    | 0.364        | 0.035 | 3.28 x 10E-24 |
| rs6919346  | 6   | 2023 | A/G/0.15    | -0.424       | 0.043 | 4.67 x 10E-22 |
| rs7740824  | 6   | 2021 | A/C/0.24    | 0.356        | 0.037 | 2.24 x 10E-21 |
| rs388170   | 6   | 2023 | A/G/0.28    | 0.329        | 0.034 | 3.26 x 10E-21 |
| rs9365164  | 6   | 2022 | A/G/0.28    | 0.327        | 0.034 | 4.66 x 10E-21 |
| rs9364554  | 6   | 2018 | A/G/0.24    | 0.353        | 0.037 | 5.26 x 10E-21 |
| rs813641   | 6   | 2022 | A/G/0.21    | -0.355       | 0.038 | 1.70 x 10E-20 |
| rs13231    | 6   | 2023 | G/A/0.28    | -0.320       | 0.035 | 1.08 x 10E-19 |

Abbreviations: SNP, single nucleotide polymorphism; Chr, chromosome number, MAF, minor allele frequency.

\*In g/dL for logLp(a) per minor allele from an additive model.

**eTable2. Age- and sex-adjusted association of Lp(a) with carotid intima-media thickness (IMT) and brachial flow-mediated dilation (FMD) according to gene score (10 SNPs)\* instrumented regression analysis.**

| <b>Exposure</b>              | <b>Outcome</b>                    | <b>N</b> | <b>Regression coefficient (SE)</b> | <b><i>P</i></b> |
|------------------------------|-----------------------------------|----------|------------------------------------|-----------------|
| LogLp(a) lipoprotein in 1986 | IMT in 2001, mm                   | 1009     | -0.013 (0.014)                     | 0.35            |
| LogLp(a) lipoprotein in 1986 | IMT in 2007, mm                   | 963      | -0.018 (0.012)                     | 0.16            |
| LogLp(a) lipoprotein in 1986 | $\Delta$ IMT (2001-2007), mm      | 817      | -0.011 (0.012)                     | 0.38            |
| LogLp(a) lipoprotein in 2007 | IMT in 2007, mm                   | 1980     | -0.000 (0.004)                     | 0.91            |
| LogLp(a) lipoprotein in 1986 | FMD in 2001, %                    | 946      | 0.865 (0.595)                      | 0.15            |
| LogLp(a) lipoprotein in 1986 | FMD in 2007, %                    | 956      | -0.819 (0.612)                     | 0.18            |
| LogLp(a) lipoprotein in 1986 | $\Delta$ FMD (2001-2007), %-units | 761      | -1.262 (0.780)                     | 0.11            |
| LogLp(a) lipoprotein in 2007 | FMD in 2007, %                    | 1965     | -0.139 (0.193)                     | 0.47            |

\*rs783147, rs2457564, rs2076828, rs2504926, rs1782627, rs2048327, rs2292334, rs1652500, rs11970528, and rs2186129. Genetic score is the simple sum of effect alleles (additive model).
